# Supplementary material for: Therapeutic Effect of a Latent Form of Cortistatin in Experimental Inflammatory and Fibrotic Disorders
Source: MDPI journal article supplement (doi:10.3390/pharmaceutics14122785), 2022-12-13
Supplement: s1 [file s1]

*Article*

# **Therapeutic Effect of a Latent Form of Cortistatin in Experimental Inflammatory and Fibrotic Disorders**

Jenny Campos-Salinas \*, Margarita Barriga and Mario Delgado \*

## **Supplementary Figures**

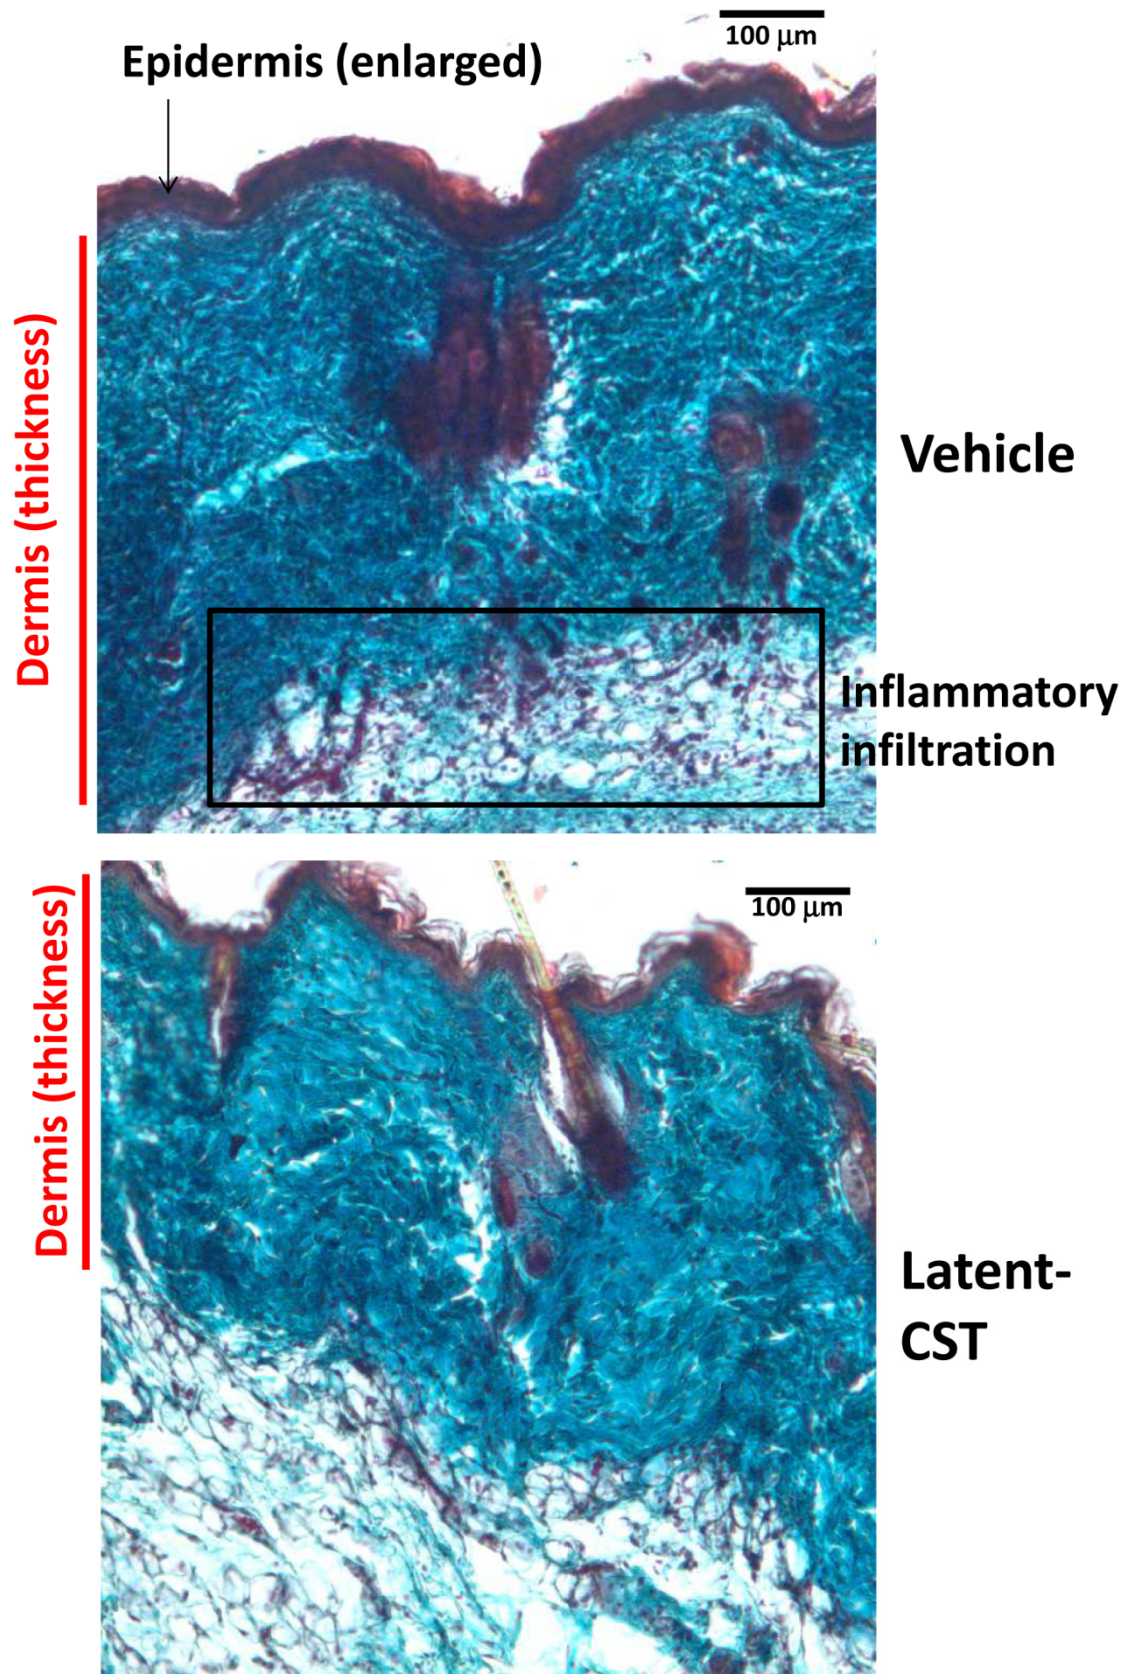

**Supplementary Figure S1.** Histological sections of skin biopsies from mice with bleomycin-induced dermal fibrosis (see Figure 5) showing dermal thickness, enlargement of epidermal layer and inflammatory infiltration (square in hypodermis) in vehicle-treated animals. Latent-CST treatment reduced these histopathological signs.



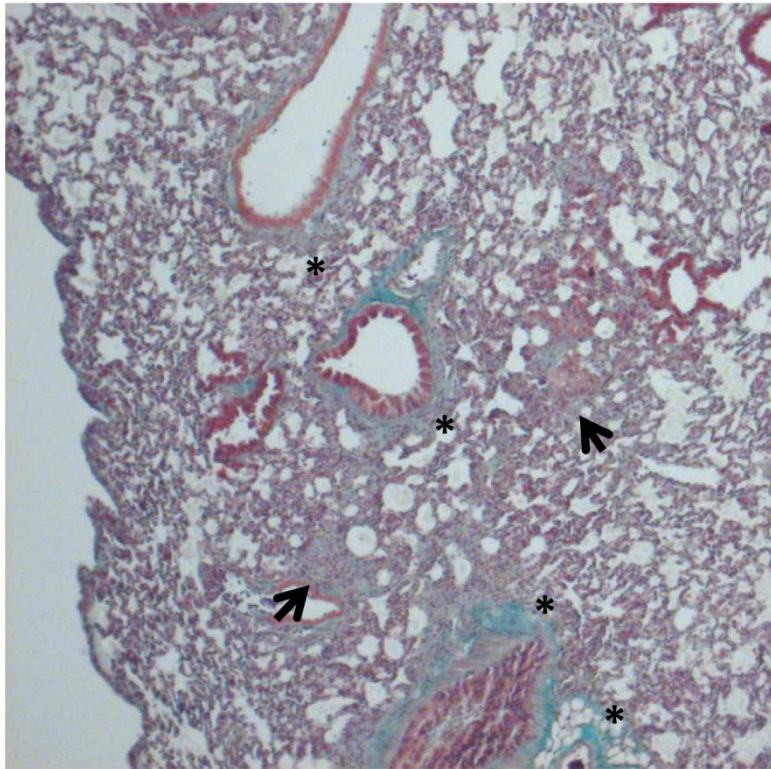

**Vehicle**

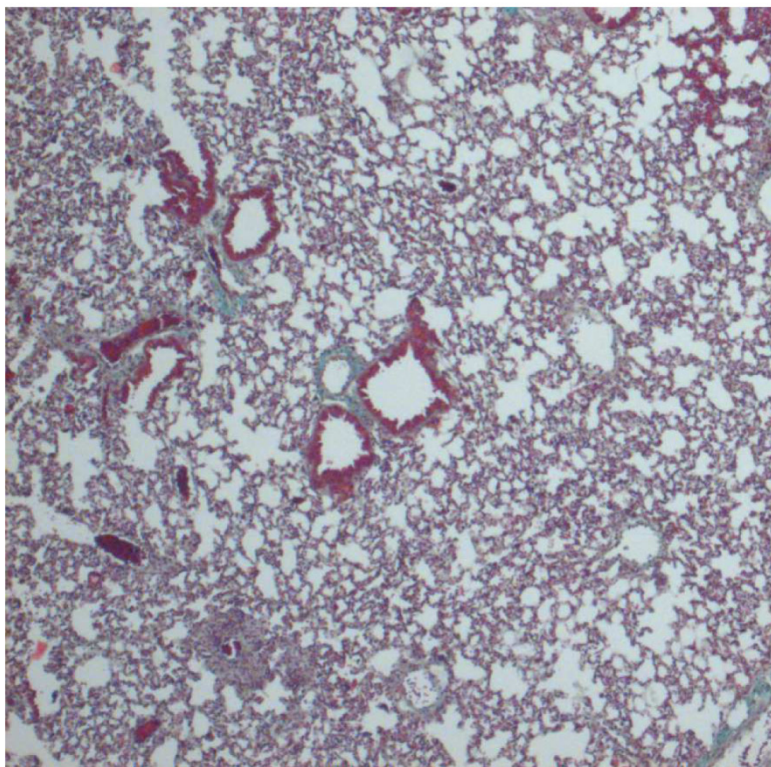

**Latent-CST**

**Supplementary Figure S2.** Histological sections of lung biopsies from mice with bleomycin-induced dermal fibrosis (see Figure 5) showing marked pulmonary fibrosis (asterisks), generalized thickening of alveolar septa and foci with almost devoid of alveolar space (arrows) in the vehicle-treated animals. Latent-CST treatment significantly avoided these histopathological signs.



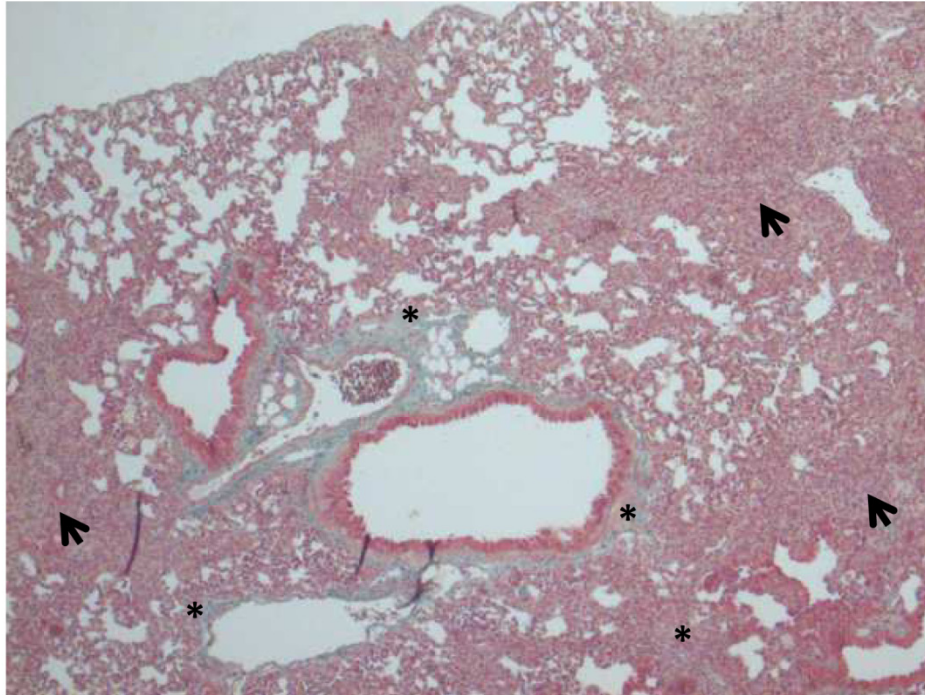

**Vehicle**

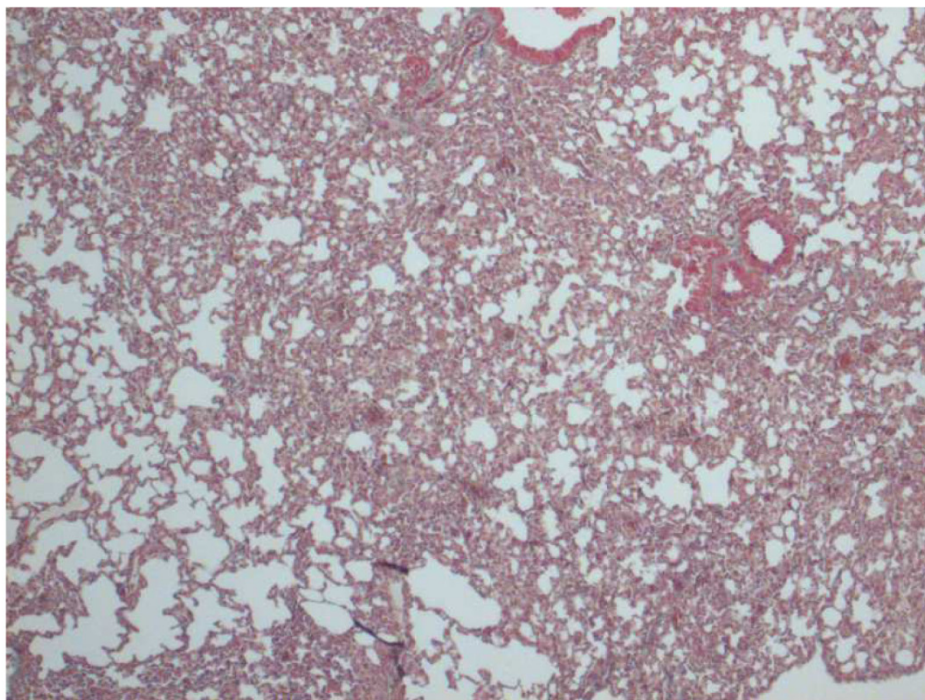

**Latent-CST**

**Supplementary Figure S3.** Histological sections of lung biopsies from mice with bleomycin-induced pulmonary fibrosis (see Figure 6b-c) showing extensive peribronchiolar fibrosis (asterisks), marked damage of pulmonary architecture with significant thickening of alveolar septa and extensive areas with obliterated alveolar space (arrows) in the vehicle-treated animals, which were significantly reduced by the treatment with Latent-CST.
